# Supplementary material
Source: HighWire-hosted journal article supplement (https://gut.bmj.com/content/69/9/1608)

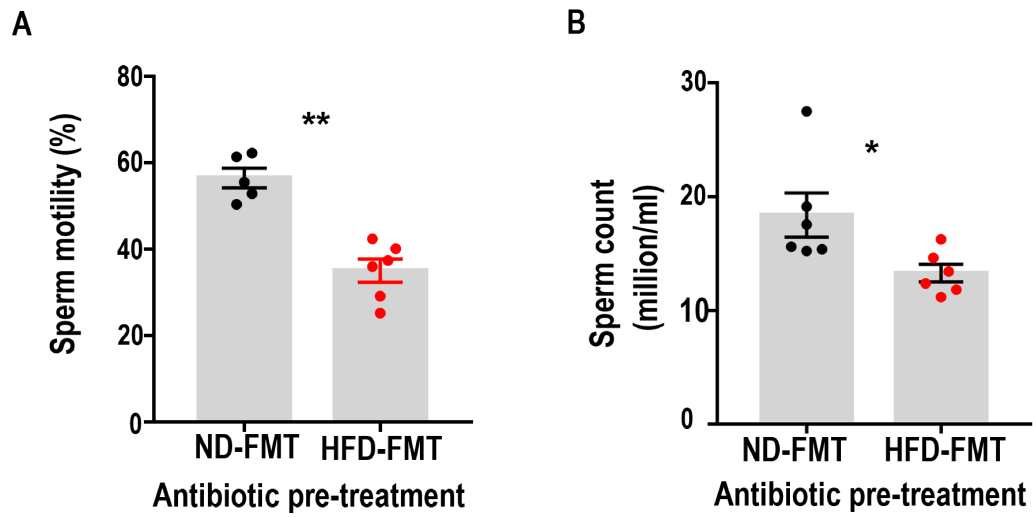

Supplementary figure 6

Supplement: inline-supplementary-material-11 [file inline-supplementary-material-11.pdf]

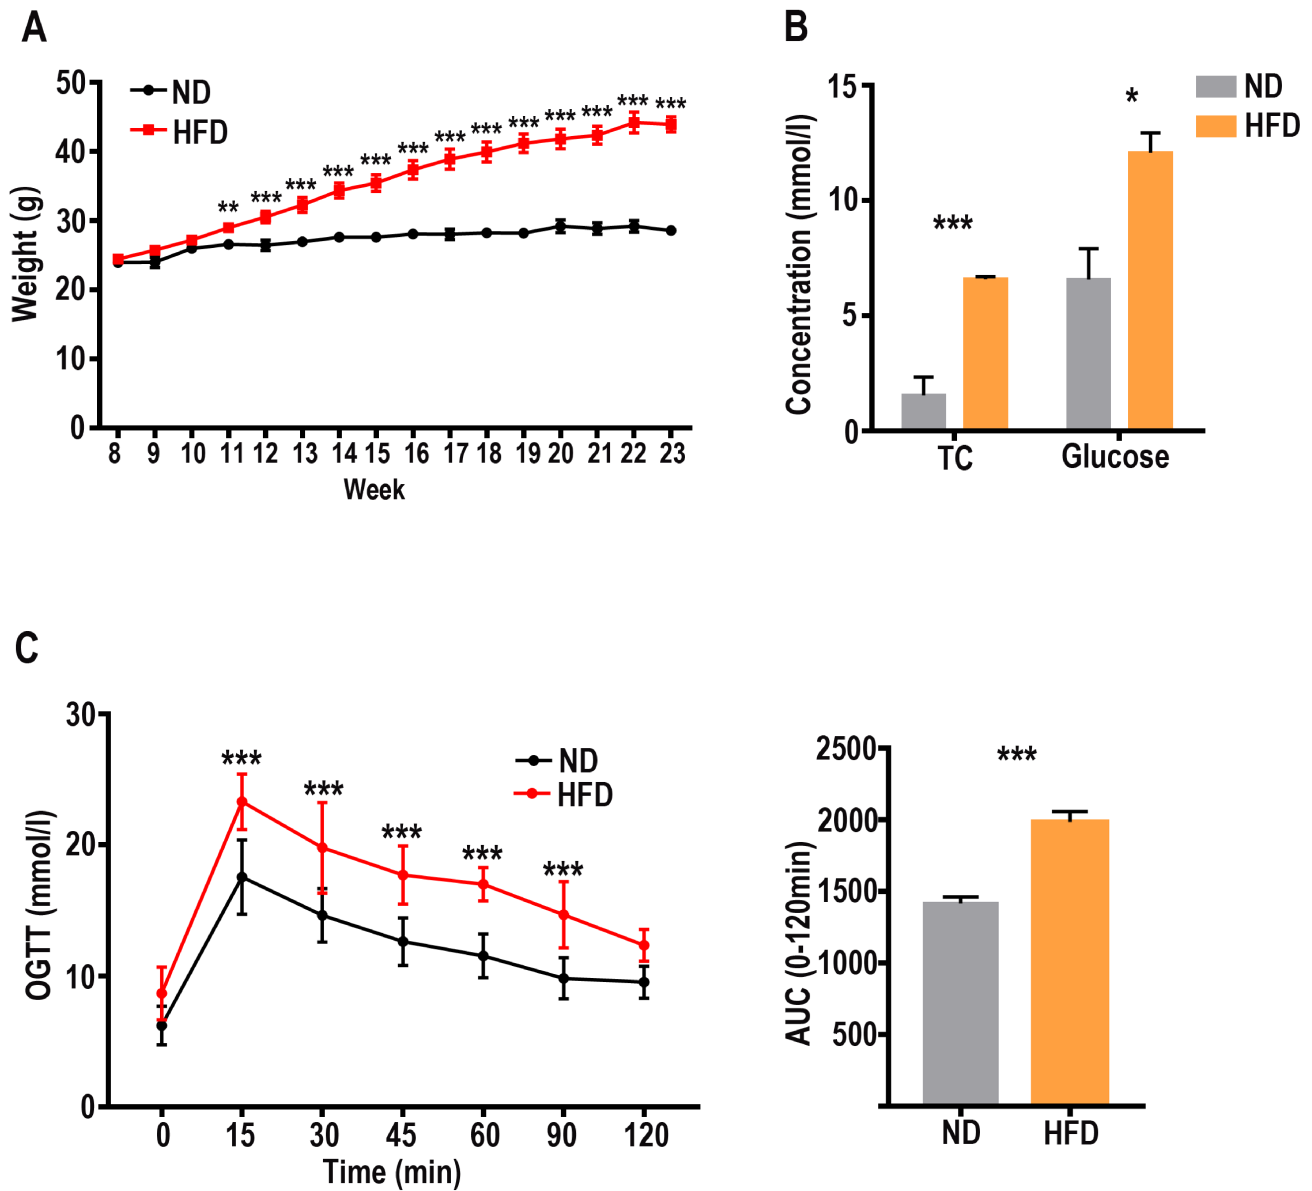

Supplementary figure 1

Supplement: inline-supplementary-material-3 [file inline-supplementary-material-3.pdf]

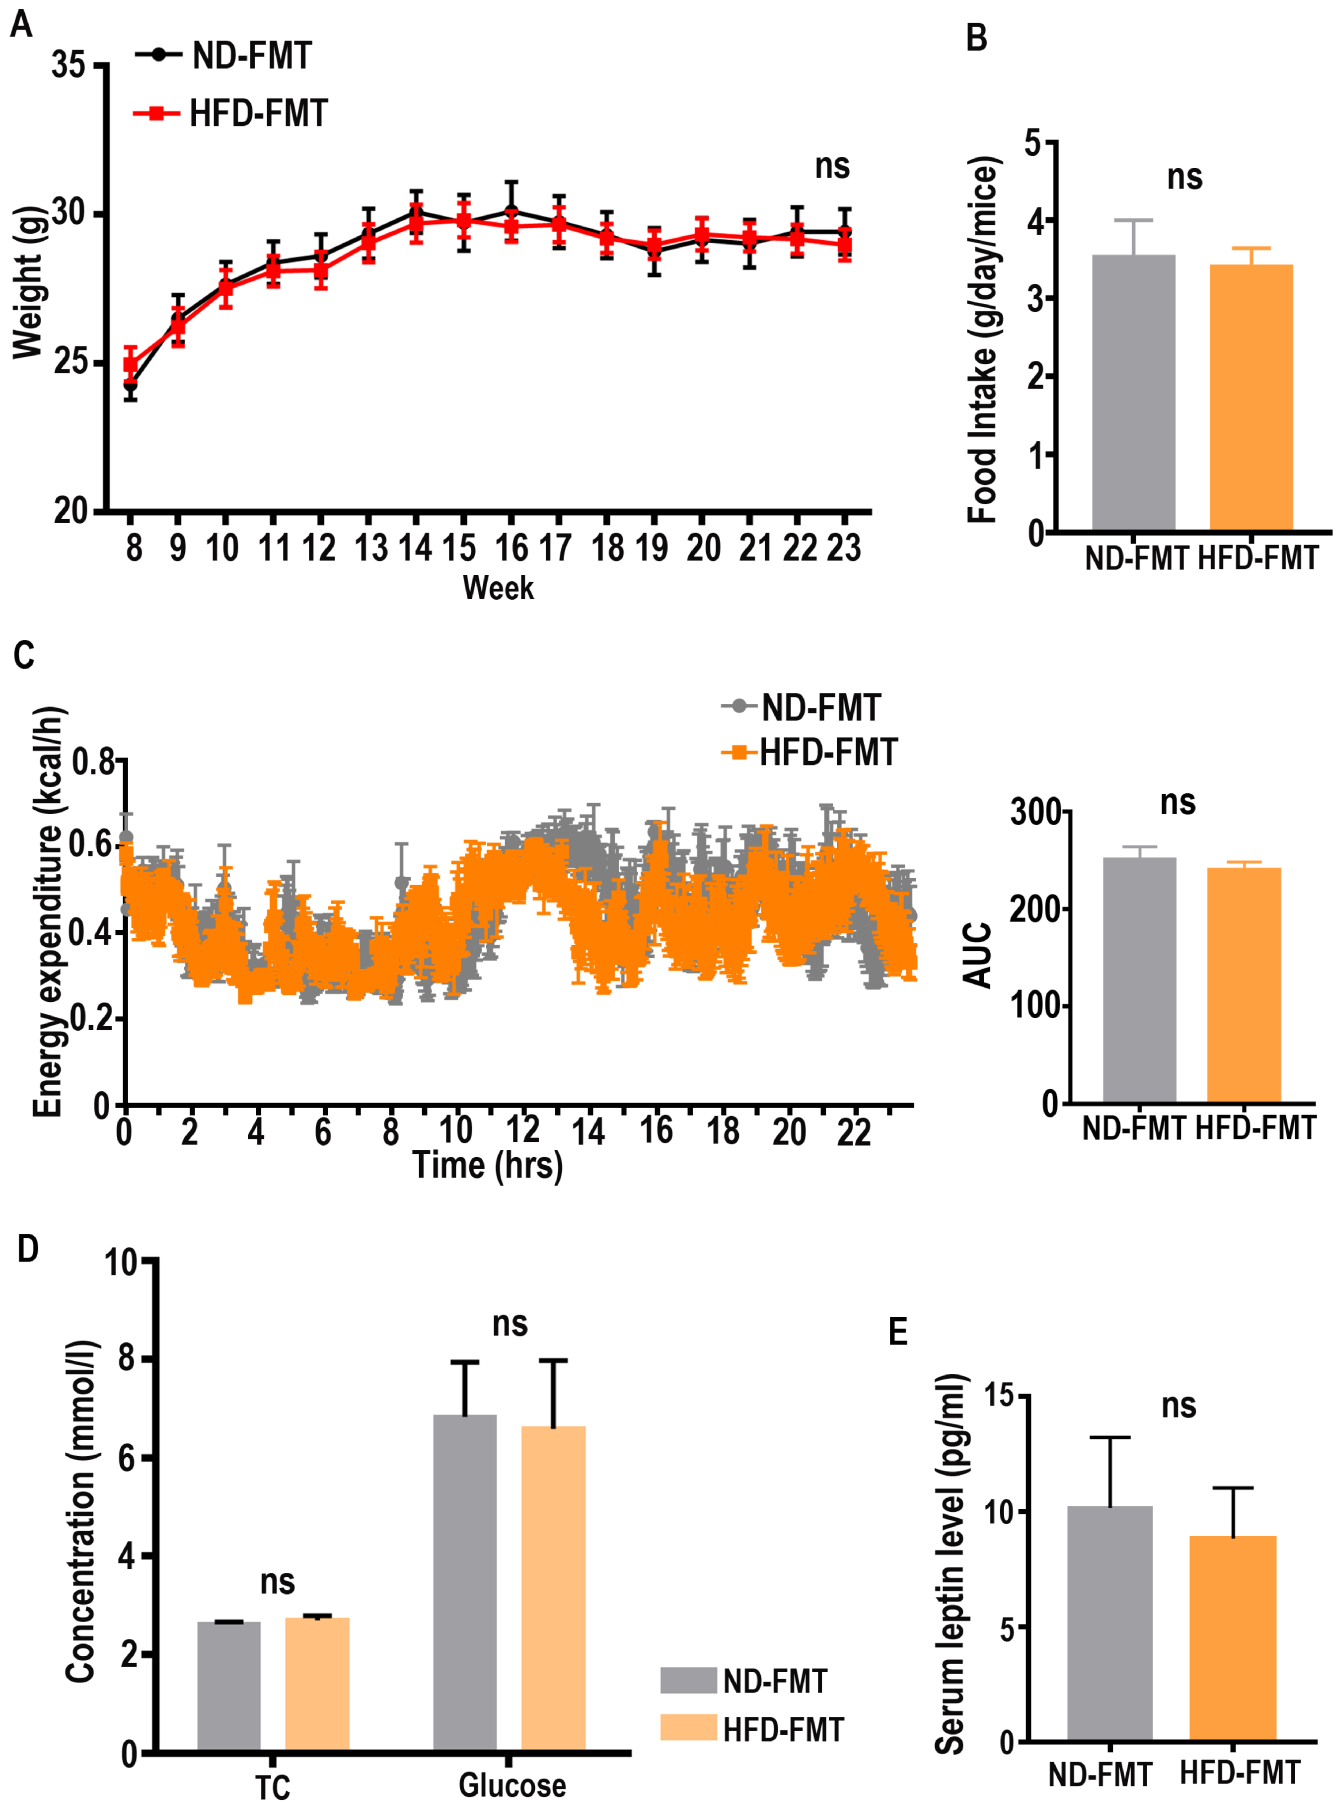

Supplementary figure 2

Supplement: inline-supplementary-material-6 [file inline-supplementary-material-6.pdf]

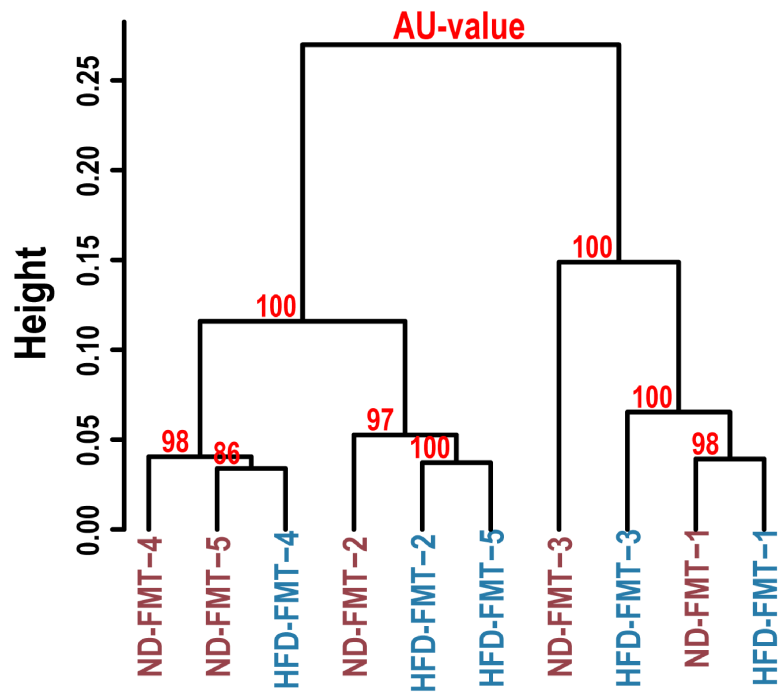

Supplementary figure 3

Supplement: inline-supplementary-material-7 [file inline-supplementary-material-7.pdf]

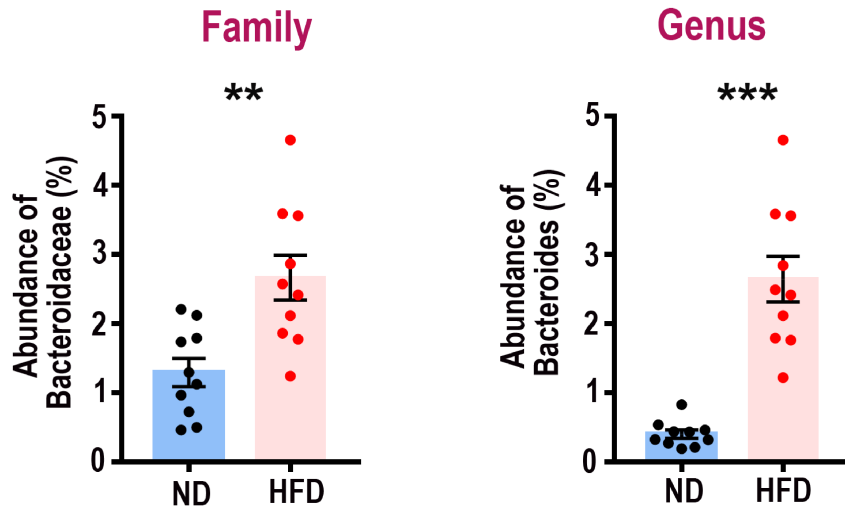

Supplementary figure 4

Supplement: inline-supplementary-material-9 [file inline-supplementary-material-9.pdf]
